# Supplementary material for: MicroRNA Expression Characterizes Oligometastasis(es)
Source: PubMed Central journal article supplement (PMC3236765; doi:10.1371/journal.pone.0028650), 2011-12-13
Supplement: pone.0028650.s004.pdf [file pone.0028650.s004.pdf]

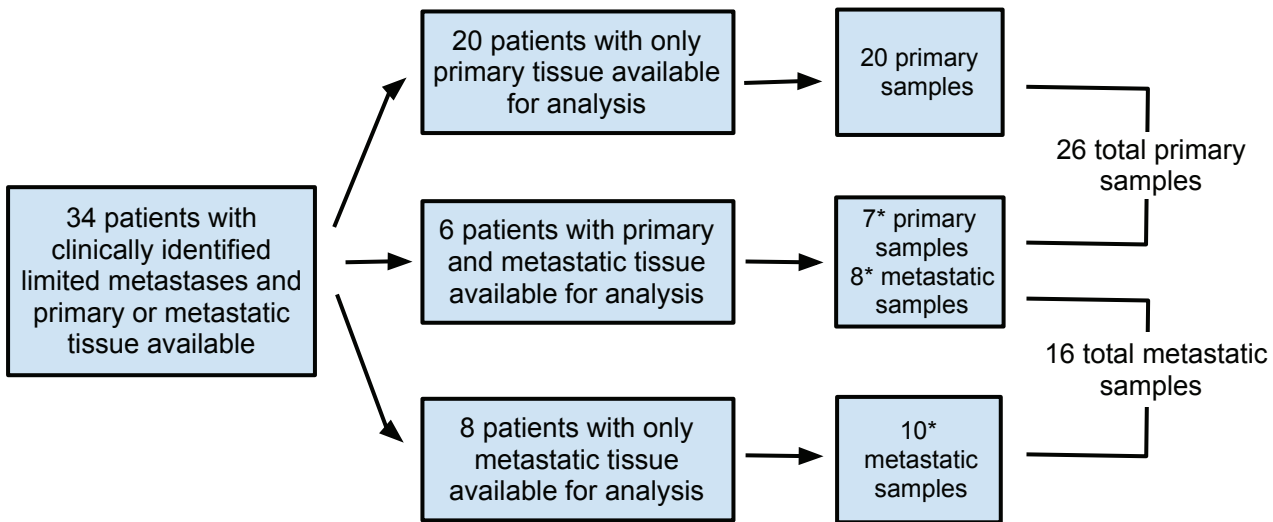

Supplemental Figure S4. The sources of individual samples, each representing a separate lesion is shown. The \* represents a single sample excluded because of excessive undetected microRNAs.
