# Supplementary material for: MicroRNA Expression Characterizes Oligometastasis(es)
Source: PubMed Central journal article supplement (PMC3236765; doi:10.1371/journal.pone.0028650), 2011-12-13
Supplement: pone.0028650.s005.pdf [file pone.0028650.s005.pdf]

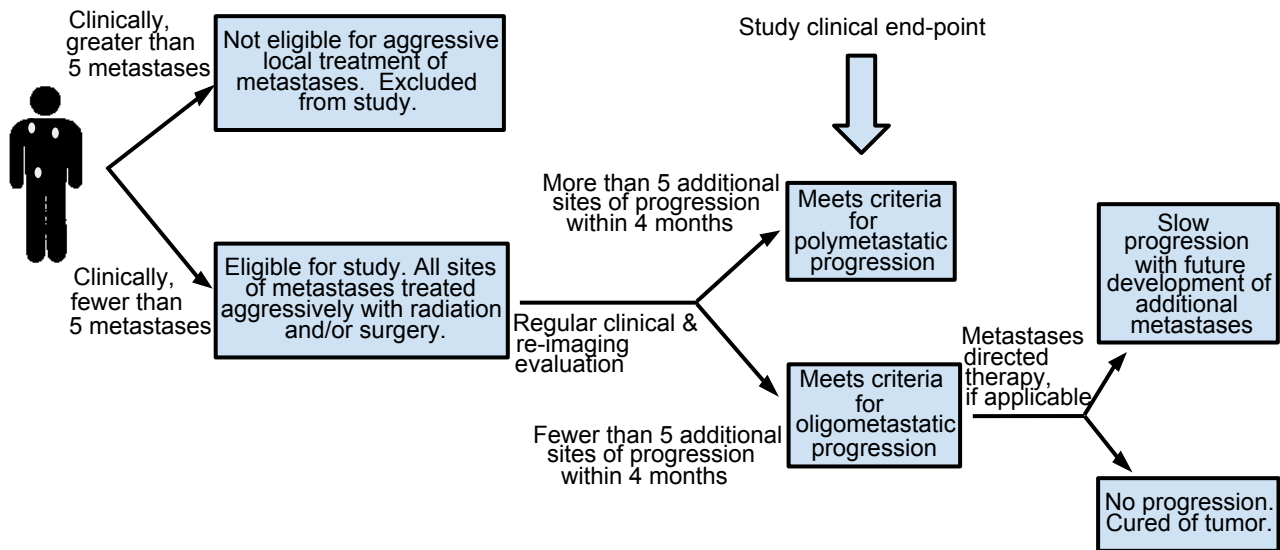

Supplementary Figure S5. Definitions of oligo- and poly- metastatic progression.
