# Supplementary material for: MicroRNA Expression Characterizes Oligometastasis(es)
Source: PubMed Central journal article supplement (PMC3236765; doi:10.1371/journal.pone.0028650), 2011-12-13
Supplement: pone.0028650.s007.pdf [file pone.0028650.s007.pdf]

**Supplementary Table S2: Description of patient characteristics for primary tissue samples ordered by patient ID.** The primary tumor was treated with curative intent and controlled (i.e., no clinical evidence of disease) before the development of metastatic disease in all but four patients, who each had synchronous presentations. Number of metastasis(es) are recorded as cumulative numbers since discovery of primary at the time of “radiation” or of “tissue sampling”. Time to metastasis(es) defined as time to development of metastasis(es) after primary cancer diagnosis. Regional nodal metastasis(es) are not included in this study and all nodal sites listed represent distant metastases. Metastasis(es) needed to be visible on CT or MRI at the time of radiotherapy. The total number of metastasis(es) was limited to ≤5 at the onset of the initial evaluation for treatment. During the follow-up period, patients who remained classified with the oligometastatic state demonstrated a cumulative number of metastasis(es) from 1 to 5 and did not have pericardial, pleural, cerebrospinal, or ascitic fluid. All reported count of metastasis(es) are cumulative from time of diagnosis. Abbreviations: HNSCC = Head and neck squamous cell carcinoma; Ol = oligometastatic progression or not progressing; Pol = polymetastatic progression; Pr = sample of primary tumor, #=cumulative count of.

| Patient ID | Sample ID | Primary type | Primary Histology             | Gender | Time to meta-stasis(es) (months) <sup>(i)</sup> | Age (Yrs) | Metas-tasis(es) at Radiation (#) | Meta-stasis(es) at time of primary tissue sampling <sup>§</sup> (#) | Time to last imaging follow-up of "Ol" <sup>Δ</sup> | Total # of new metastasis(es) within 4 months of 1 <sup>st</sup> metastatic progression after radiotherapy | Alive | Survival Months |
|------------|-----------|--------------|-------------------------------|--------|-------------------------------------------------|-----------|----------------------------------|---------------------------------------------------------------------|-----------------------------------------------------|------------------------------------------------------------------------------------------------------------|-------|-----------------|
| 1          | Pol-5Pr   | Lung         | SCC                           | Female | 16.6                                            | 66.1      | 5                                | 0                                                                   | n/a                                                 | >10                                                                                                        | No    | 10.5            |
| 2          | Pol-1Pr   | Breast       | Infiltrating ductal carcinoma | Female | 49.6                                            | 55.1      | 1                                | 0                                                                   | n/a                                                 | pleural (Pol)                                                                                              | No    | 27.4            |
| 4          | Pol-6Pr   | Ovarian      | Papillary serous carcinoma    | Female | 0                                               | 70.2      | 1                                | 1                                                                   | n/a                                                 | peritoneal                                                                                                 | No    | 29.5            |
| 6          | Pol-2Pr   | Colorectal   | Adenocarcinoma                | Female | 1.9                                             | 55.8      | 5                                | 5                                                                   | n/a                                                 | >10                                                                                                        | No    | 11.5            |
| 13         | Ol-8Pr    | HNSCC        | SCC                           | Male   | 6.6                                             | 64.4      | 2                                | 0                                                                   | 14.8                                                | 1                                                                                                          | No    | 14.9            |
| 15         | Ol-17Pr   | Renal        | Chromophobe                   | Male   | 14.2                                            | 58.9      | 3                                | 0                                                                   | 21.7                                                | 1                                                                                                          | Yes   | 33.6            |
| 18         | Ol-9Pr    | HNSCC        | SCC                           | Female | 14.2                                            | 69.4      | 2                                | 0                                                                   | 10.2                                                | 0                                                                                                          | No    | 10.2            |
| 22         | Ol-19Pr1  | Sarcoma      | Malignant Fibrohistiocytic    | Female | 57.0                                            | 55.9      | 4                                | 0                                                                   | 2.5 <sup>^</sup>                                    | 3                                                                                                          | Yes   | 29.2            |
| 22         | Ol-19Pr2  | Sarcoma      | Malignant Fibrohistiocytic    | Female | 57.0                                            | 55.9      | 4                                | 0                                                                   | 2.5 <sup>^</sup>                                    | 3                                                                                                          | Yes   | 29.2            |
| 26         | Ol-3Pr    | Small Bowel  | Adenocarcinoma                | Male   | 115.1                                           | 62.1      | 1                                | 0                                                                   | 39.5                                                | 3                                                                                                          | Yes   | 43.3            |
| 27         | Ol-4Pr    | Colorectal   | Adenocarcinoma                | Female | 2.3                                             | 76.9      | 2                                | 0                                                                   | 41.5                                                | 0                                                                                                          | Yes   | 41.5            |
| 39         | Pol-7Pr   | Sarcoma      | Ewings sarcoma                | Male   | 10.1                                            | 64.4      | 1                                | 0                                                                   | n/a                                                 | 7                                                                                                          | No    | 11.9            |
| 46         | Pol-3Pr   | Small Bowel  | Adenocarcinoma                | Male   | 11.1                                            | 53.8      | 1                                | 0                                                                   | n/a                                                 | ascites (Pol)                                                                                              | No    | 8.4             |
| 52         | Ol-13Pr   | Parotid      | Adenoid cystic                | Female | 64.3                                            | 66.7      | 3                                | 0                                                                   | 24.1                                                | 0                                                                                                          | Yes   | 24.1            |
| 57         | Ol-15Pr   | Renal        | Clear cell                    | Female | 42.3                                            | 56.3      | 1                                | 0                                                                   | 13.1                                                | 0                                                                                                          | Yes   | 13.1            |
| 58         | Ol-12Pr   | Parotid      | Adenocarcinoma                | Male   | 44.8                                            | 75.8      | 1                                | 0                                                                   | 15.2                                                | 3                                                                                                          | Yes   | 15.4            |
| 60         | Ol-16Pr   | Renal        | Renal cell carcinoma          | Female | 302.6                                           | 70.1      | 4                                | 1                                                                   | 15.6                                                | 0                                                                                                          | Yes   | 18.1            |
| 65         | Ol-11Pr   | Thymus       | Large cell neuroendocrine     | Male   | 68.9                                            | 48.7      | 1                                | 0                                                                   | 14.9                                                | 0                                                                                                          | Yes   | 14.9            |
| *209       | Ol-10Pr   | Lung         | Adenosquamous                 | Female | 3.7                                             | 57.3      | 2                                | 0                                                                   | 16.1                                                | 1                                                                                                          | No    | 17.4            |
| *217       | Ol-2Pr    | Breast       | Infiltrating ductal carcinoma | Female | 52.4                                            | 91.2      | 1                                | 0                                                                   | 15.6                                                | 0                                                                                                          | Yes   | 15.6            |
| *220       | Ol-7Pr    | Colorectal   | Adenocarcinoma                | Female | 0                                               | 65.3      | 3                                | 1                                                                   | 14.6                                                | 1                                                                                                          | Yes   | 16.9            |
| *221       | Ol-1Pr    | Breast       | Infiltrating ductal carcinoma | Female | 126.5                                           | 50.2      | 1                                | 0                                                                   | 18.8                                                | 0                                                                                                          | Yes   | 19.0            |
| *228       | Ol-14Pr   | Bladder      | Urothelial Carcinoma          | Male   | 7.5                                             | 65.8      | 1                                | 0                                                                   | 6.8                                                 | 1                                                                                                          | Yes   | 8.7             |
| *230       | Pol-4Pr   | Liver        | Hepatocellular carcinoma      | Male   | 39.1                                            | 62.3      | 1                                | 0                                                                   | n/a                                                 | 6                                                                                                          | Yes   | 11.1            |
| *231       | Ol-5Pr    | Colorectal   | Adenocarcinoma                | Male   | 63.4                                            | 70.1      | 4                                | 0                                                                   | 5.7                                                 | 0                                                                                                          | Yes   | 5.7             |
| *244       | Ol-6Pr    | Colorectal   | Adenocarcinoma                | Male   | 49.3                                            | 70.1      | 1                                | 0                                                                   | 10.6                                                | 3                                                                                                          | Yes   | 10.6            |

\* Patient data collected retrospectively; <sup>^</sup> This patient was followed up 29.2 months by the research nurse and reports being clinically stable and off chemotherapy with no planned imaging, however last imaging occurred at The U of C at time 2.5 months. <sup>†</sup> Patient #4 presented with synchronous metastases. The primary tumor was treated with curative surgical intent and locally controlled over follow up. <sup>§</sup>The total cumulative number of metastatic lesions, per patient, did not exceed five during the initial evaluation of the patient. Since multiple metastases could exist in each patient, the total number of metastatic lesions sampled was between one and two. Metastatic tumor tissue for sampling was obtained prior to chemotherapy in all patients from the location deemed by the multidisciplinary team least likely to cause morbidity/complication. <sup>Δ</sup> The polymetastatic time to progression is defined by the interval from the presentation of the first site of metastasis until the cumulative number exceeds 5 (>5). (i) Four patients were diagnosed with metastatic disease within one month of the primary tumor diagnosis. For these patients the primary tumor was addressed with curative I surgical intent and controlled with follow up as well.
