# Supplementary material for: MicroRNA Expression Characterizes Oligometastasis(es)
Source: PubMed Central journal article supplement (PMC3236765; doi:10.1371/journal.pone.0028650), 2011-12-13
Supplement: pone.0028650.s008.pdf [file pone.0028650.s008.pdf]

**Supplementary Tables S3. Characteristics of patients with oligometastatic and polymetastatic progression in metastasis(es) samples.**

No patient received chemotherapy concurrently with the radiation therapy. Adjuvant chemotherapy was initiated following RT only for patients showed progression. **Legend:** two-tailed Student t-test (t-test), two-tailed Fisher's Exact Test (FET), non-parametric Mann Whitney Test (MWT), logrank survival test (Logrank), NSCLC = non small cell lung cancer, SCLC = small cell lung cancer;  $\alpha$ =1 brain and 1 lung metastasis from same patient,  $\infty$  = 1 omental and 1 small bowel metastasis from same patient, \*=statistically significant.

| <b>Patients (#)</b>                                                           | <b>All<br/>(N=14)</b> | <b>Oligometastatic<br/>Progression<br/>(N=9)</b> | <b>Polymetastatic<br/>Progression<br/>(N=5)</b> | <b>p-value</b>             |
|-------------------------------------------------------------------------------|-----------------------|--------------------------------------------------|-------------------------------------------------|----------------------------|
| <b>Median Age (years)</b>                                                     | 59.6                  | 58.9                                             | 60.3                                            | 0.66 (t-test)              |
| Range:                                                                        | (34.2-80.1)           | (34.2-80.1)                                      | (55.8-70.2)                                     |                            |
| <b>Sex</b>                                                                    |                       |                                                  |                                                 | 0.30 (FET)                 |
| Female (%)                                                                    | 8 (57%)               | 4 (44%)                                          | 4 (80%)                                         |                            |
| Male (%)                                                                      | 6 (43%)               | 5 (56%)                                          | 1 (20%)                                         |                            |
| <b>Primary tumor type</b>                                                     | 14                    | 9                                                | 5                                               |                            |
| Colorectal                                                                    | 2                     | 0                                                | 2                                               |                            |
| Head and Neck                                                                 | 1                     | 1                                                | 0                                               |                            |
| Lung, NSCLC                                                                   | 3                     | 2                                                | 1                                               |                            |
| Lung, SCLC                                                                    | 1                     | 0                                                | 1                                               |                            |
| Ovarian                                                                       | 1                     | 0                                                | 1                                               |                            |
| Renal                                                                         | 4                     | 4                                                | 0                                               |                            |
| Sarcoma                                                                       | 2                     | 2                                                | 0                                               |                            |
| <b>Metastatic Tissue Origin</b>                                               | 16                    | 10                                               | 6                                               |                            |
| Adrenal metastasis                                                            | 2                     | 1                                                | 1                                               |                            |
| Brain $\alpha$                                                                | 2                     | 1                                                | 1                                               |                            |
| Chest wall metastasis                                                         | 1                     | 1                                                | 0                                               |                            |
| Lung metastasis $\alpha$                                                      | 3                     | 3                                                | 0                                               |                            |
| Lymph node metastasis                                                         | 4                     | 3                                                | 1                                               |                            |
| Peritoneal/omental<br>metastasis $\infty$                                     | 2                     | 0                                                | 2                                               |                            |
| Small bowel metastasis $\infty$                                               | 1                     | 0                                                | 1                                               |                            |
| Spleen Metastasis                                                             | 1                     | 1                                                | 0                                               |                            |
| <b>Median # prior and current<br/>metastasis(es) at radiation<br/>(Range)</b> | 2.5 (1-5)             | 3 (1-4)                                          | 1 (1-5)                                         | 0.70 (MWT)                 |
| <b>Median # of metastasis(es) at<br/>tissue sampling (Range)</b>              | 1 (1-9)               | 1 (1-3)                                          | 2 (1-9)                                         | 0.24 (MWT)                 |
| <b>Survival:</b> (alive throughout<br>follow-up/ total per group)             | 7 / 14                | 7 / 9                                            | 0 / 5                                           | <b>0.021*</b><br>(FET)     |
| <b>Median follow-up:</b> (months)<br>Range:                                   | 22.0<br>(6.9-42.5)    | 29.2<br>(6.9-42.5)                               | 17.9<br>(11.5-29.5)                             | <b>0.014*</b><br>(Logrank) |
