# Supplementary material for: MicroRNA Expression Characterizes Oligometastasis(es)
Source: PubMed Central journal article supplement (PMC3236765; doi:10.1371/journal.pone.0028650), 2011-12-13
Supplement: pone.0028650.s009.pdf [file pone.0028650.s009.pdf]

**Supplementary Tables S4. Characteristics of patients with oligometastatic and polymetastatic progression in primary tumor samples.**

No patient received chemotherapy concurrently with the radiation therapy. Adjuvant chemotherapy was initiated following RT only for patients showed progression. **Legend:** two-tailed Student t-test (t-test), two-tailed Fisher's Exact Test (FET), non-parametric Mann Whitney Test (MWT), logrank survival test (Logrank), NSCLC = non small cell lung cancer, SCLC = small cell lung cancer; α=1 brain and 1 lung metastasis from same patient, ∞ = 1 omental and 1 small bowel metastasis from same patient, \*=statistically significant.

| <b>Patients (#)</b>                                                           | <b>All<br/>(N=25)</b> | <b>Oligometastatic<br/>Progression<br/>(N=18)</b> | <b>Polymetastatic<br/>Progression<br/>(N=7)</b> | <b>p-value<br/>(test)</b>    |
|-------------------------------------------------------------------------------|-----------------------|---------------------------------------------------|-------------------------------------------------|------------------------------|
| <b>Median Age (years)</b>                                                     | 64.4                  | 65.6                                              | 62.3                                            | 0.32                         |
| Range:                                                                        | (48.7-91.2)           | (48.7-91.2)                                       | (53.7-70.2)                                     | (t-test)                     |
| <b>Gender</b>                                                                 | 14 (56%)              | 10 (56%)                                          | 4 (57%)                                         | 1.00 (FET)                   |
| Female (%)                                                                    | 11 (44%)              | 8 (44%)                                           | 3 (43%)                                         |                              |
| Male (%)                                                                      |                       |                                                   |                                                 |                              |
| <b>Primary Tumor Sites<br/>Sampled:</b>                                       | 25                    | 18                                                | 7                                               |                              |
| Bladder                                                                       | 1                     | 1                                                 | 0                                               |                              |
| Breast                                                                        | 3                     | 2                                                 | 1                                               |                              |
| Colorectal                                                                    | 5                     | 4                                                 | 1                                               |                              |
| Head and Neck                                                                 | 2                     | 2                                                 | 0                                               |                              |
| Liver                                                                         | 1                     | 0                                                 | 1                                               |                              |
| Lung, NSCLC*                                                                  | 2                     | 1                                                 | 1                                               |                              |
| Ovarian                                                                       | 1                     | 0                                                 | 1                                               |                              |
| Renal                                                                         | 3                     | 3                                                 | 0                                               |                              |
| Salivary Gland                                                                | 2                     | 2                                                 | 0                                               |                              |
| Sarcoma                                                                       | 2                     | 1                                                 | 1                                               |                              |
| Small Bowel                                                                   | 2                     | 1                                                 | 1                                               |                              |
| Thymus                                                                        | 1                     | 1                                                 | 0                                               |                              |
| <b>Median # prior and current<br/>metastasis(es) at radiation<br/>(Range)</b> | 1 (1-5)               | 2 (1-4)                                           | 1 (1-5)                                         | 0.69<br>(MWT)                |
| <b>Median # of metastasis(es)<br/>at tissue sampling (Range)</b>              | 0 (0-5)               | 0 (0-1)                                           | 0 (0-5)                                         | 0.46<br>(MWT)                |
| <b>Survival:</b> (alive throughout<br>follow-up)                              | 16 / 25               | 15 / 18                                           | 1 / 7                                           | <b>0.0029*</b><br>(FET)      |
| <b>Median Follow-up:</b><br>(months)<br>Range:                                | 15.4<br>(5.7-43.3)    | 16.2<br>(5.7-43.3)                                | 11.5<br>(8.4-29.5)                              | <b>0.0025*</b><br>(Logrank ) |
