# Supplementary material for: MicroRNA Expression Characterizes Oligometastasis(es)
Source: PubMed Central journal article supplement (PMC3236765; doi:10.1371/journal.pone.0028650), 2011-12-13
Supplement: pone.0028650.s010.pdf [file pone.0028650.s010.pdf]

**Supplemental Table S5: Patients and treatment characteristics.**

No patient received chemotherapy concurrently with the radiation therapy. Adjuvant chemotherapy was initiated following RT only for patients showed progression. Specifically, 20 of the 34 patients that showed disease progression received adjuvant chemotherapy after RT, among which 9 patients received adjuvant chemotherapy within 6 months of radiation. The rest 14 out of the 34 patients did not receive any additional systemic therapy after RT.

| <b>Characteristic</b>                | <b>No. of patients</b> |
|--------------------------------------|------------------------|
| No. of Patients                      | 34 (100%)              |
| Median Age (range)                   | 63.3 (34.2-91.2)       |
| <b>Radiographic Staging Modality</b> |                        |
| PET/CT                               | 18 (53%)               |
| CT chest/ab/pelvis                   | 7 (21%)                |
| CT chest/ab/pelvis & bone scan       | 6 (18%)                |
| MRI brain, CT chest/ab/pelvis        | 1 (3%)                 |
| MRI brain, PET scan                  | 1 (3%)                 |
| MRI pelvis, bone scan                | 1 (3%)                 |
| <b>Chemotherapy</b>                  |                        |
| Prior systemic chemotherapy          | 27 (80%)               |
| Post HIGRT chemotherapy              | 20 (59%)               |
| Within 6 mo                          | 9 (26%)                |
| 6-12 months                          | 5 (15%)                |
| Greater than 12 months               | 6 (18%)                |
